# Supplementary material
Source: PubMed Central journal article supplement (PMC5748906)
Supplement: ASN.2017030253SupplementaryData1.pdf [file ASN.2017030253SupplementaryData1.pdf]

## **Supplementary Material**

- **Supplemental figure legends**
- **Supplemental figures**
- **Supplemental tables**
- **Supplemental methods**
- **References**

**Supplemental Figure Legends:**

**Supplemental Figure 1:** Effect modification of the association between PM<sub>2.5</sub> and risk of kidney outcomes by age, race, gender, and BMI; \* denotes a p for interaction <0.001

## Supplemental Figure 1

### Effect Modification of the Association of PM<sub>2.5</sub> and Kidney Outcomes

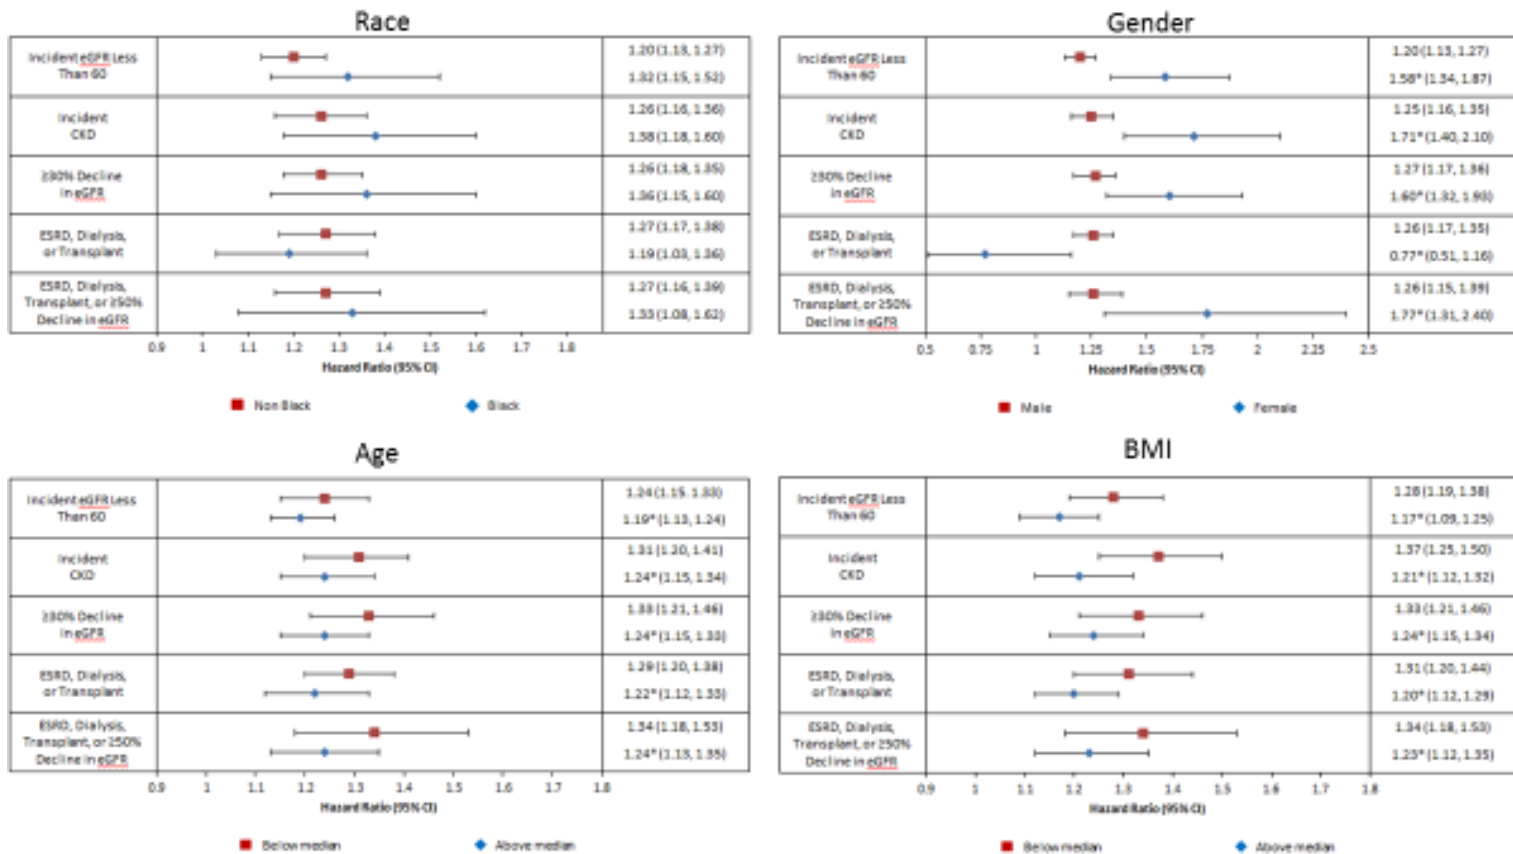

**Supplemental Table 1: Risk of renal outcomes by PM<sub>2.5</sub> concentrations categorized in quartiles**

| <b>PM<sub>2.5</sub> Exposure</b>                                                                                                                                                                                                                                                                                                                                                                                                                                                                                                                                                                                                                                                                                                                                                                                                                                                                                                                                                                                                                                                                                                        | <b>Measure</b>     | <b>Incident eGFR Less Than 60<sup>+</sup></b> | <b>Incident CKD*</b> | <b>≥ 30% Decline in eGFR</b> | <b>ESRD</b>          |
|-----------------------------------------------------------------------------------------------------------------------------------------------------------------------------------------------------------------------------------------------------------------------------------------------------------------------------------------------------------------------------------------------------------------------------------------------------------------------------------------------------------------------------------------------------------------------------------------------------------------------------------------------------------------------------------------------------------------------------------------------------------------------------------------------------------------------------------------------------------------------------------------------------------------------------------------------------------------------------------------------------------------------------------------------------------------------------------------------------------------------------------------|--------------------|-----------------------------------------------|----------------------|------------------------------|----------------------|
| Year 2004 Annual Average                                                                                                                                                                                                                                                                                                                                                                                                                                                                                                                                                                                                                                                                                                                                                                                                                                                                                                                                                                                                                                                                                                                | N                  | 1,709,761                                     | 1,644,351            | 2,482,737                    | 2,482,737            |
|                                                                                                                                                                                                                                                                                                                                                                                                                                                                                                                                                                                                                                                                                                                                                                                                                                                                                                                                                                                                                                                                                                                                         | Quartile 2 HR (CI) | 1.07<br>(1.01, 1.14)                          | 1.09<br>(1.01, 1.18) | 1.11<br>(1.05, 1.18)         | 1.06<br>(0.98, 1.13) |
|                                                                                                                                                                                                                                                                                                                                                                                                                                                                                                                                                                                                                                                                                                                                                                                                                                                                                                                                                                                                                                                                                                                                         | Quartile 3 HR (CI) | 1.09<br>(1.04, 1.15)                          | 1.11<br>(1.04, 1.19) | 1.15<br>(1.09, 1.21)         | 1.11<br>(1.04, 1.19) |
|                                                                                                                                                                                                                                                                                                                                                                                                                                                                                                                                                                                                                                                                                                                                                                                                                                                                                                                                                                                                                                                                                                                                         | Quartile 4 HR (CI) | 1.19<br>(1.13, 1.26)                          | 1.24<br>(1.15, 1.33) | 1.26<br>(1.20, 1.33)         | 1.18<br>(1.10, 1.27) |
| Time Varying                                                                                                                                                                                                                                                                                                                                                                                                                                                                                                                                                                                                                                                                                                                                                                                                                                                                                                                                                                                                                                                                                                                            | N                  | 1,702,923                                     | 1,637,643            | 2,473,531                    | 2,473,531            |
|                                                                                                                                                                                                                                                                                                                                                                                                                                                                                                                                                                                                                                                                                                                                                                                                                                                                                                                                                                                                                                                                                                                                         | Quartile 2 HR (CI) | 1.02<br>(0.97, 1.07)                          | 1.04<br>(0.99, 1.10) | 1.02<br>(0.97, 1.08)         | 1.12<br>(1.07, 1.17) |
|                                                                                                                                                                                                                                                                                                                                                                                                                                                                                                                                                                                                                                                                                                                                                                                                                                                                                                                                                                                                                                                                                                                                         | Quartile 3 HR (CI) | 1.07<br>(1.02, 1.12)                          | 1.10<br>(1.04, 1.16) | 1.06<br>(1.01, 1.12)         | 1.09<br>(1.03, 1.15) |
|                                                                                                                                                                                                                                                                                                                                                                                                                                                                                                                                                                                                                                                                                                                                                                                                                                                                                                                                                                                                                                                                                                                                         | Quartile 4 HR (CI) | 1.14<br>(1.09, 1.20)                          | 1.19<br>(1.12, 1.26) | 1.18<br>(1.10, 1.24)         | 1.18<br>(1.11, 1.25) |
| <p>Models adjusted for age, race, gender, cancer, cardiovascular disease, chronic lung disease, diabetes mellitus, hyperlipidemia, hypertension, T<sub>0</sub> eGFR, body mass index, smoking status, ACEI/ARB use, county population density, number of outpatient eGFR measurements, number of hospitalizations, and county percent in poverty.<br/>                     Quartile 1, consisting of those living in counties with the lowest PM<sub>2.5</sub>, is the reference category.<br/>                     + Incident eGFR&lt;60 was evaluated in a subcohort of people with no prior history of eGFR≤60 at time of cohort entry.<br/>                     *Incident CKD was evaluated in a subcohort of people with at least 2 eGFR separated by at least 90 days apart who had no prior history eGFR≤60 at time of cohort entry.<br/>                     Abbreviations: PM<sub>2.5</sub>, particulate matter &lt;2.5 μm in aerodynamic diameter; eGFR, estimated glomerular filtration rate; CKD, Chronic Kidney Disease; ESRD, end stage renal disease; N, sample size; HR, hazard ratio; CI, 95% confidence interval.</p> |                    |                                               |                      |                              |                      |

**Supplemental Table 2:** Risk of renal outcomes for every 10 µg/m<sup>3</sup> increase in PM<sub>2.5</sub> concentration using data from air monitoring stations within 30, 10, and 5 miles from residential ZIP code centroid of cohort participants.

| PM <sub>2.5</sub> Exposure                                                                                                                                                                                                                                                                                                                                                                                                                                                                                                                                                                                                                                                                                                                                                                                                                                                                                                               | Maximum Distance to Nearest Monitoring Station (miles) | Measure | Incident eGFR Less Than 60 <sup>+</sup> | Incident CKD*        | ≥ 30% Decline in eGFR | ESRD                 |
|------------------------------------------------------------------------------------------------------------------------------------------------------------------------------------------------------------------------------------------------------------------------------------------------------------------------------------------------------------------------------------------------------------------------------------------------------------------------------------------------------------------------------------------------------------------------------------------------------------------------------------------------------------------------------------------------------------------------------------------------------------------------------------------------------------------------------------------------------------------------------------------------------------------------------------------|--------------------------------------------------------|---------|-----------------------------------------|----------------------|-----------------------|----------------------|
| Year 2004 Annual Average                                                                                                                                                                                                                                                                                                                                                                                                                                                                                                                                                                                                                                                                                                                                                                                                                                                                                                                 | 30 miles                                               | N       | 1,303,020                               | 1,251,826            | 1,891,638             | 1,891,638            |
|                                                                                                                                                                                                                                                                                                                                                                                                                                                                                                                                                                                                                                                                                                                                                                                                                                                                                                                                          |                                                        | HR (CI) | 1.21<br>(1.18, 1.24)                    | 1.28<br>(1.24, 1.32) | 1.26<br>(1.22, 1.29)  | 1.21<br>(1.14, 1.27) |
|                                                                                                                                                                                                                                                                                                                                                                                                                                                                                                                                                                                                                                                                                                                                                                                                                                                                                                                                          | 10 miles                                               | N       | 788,875                                 | 756,602              | 1,141,684             | 1,141,684            |
|                                                                                                                                                                                                                                                                                                                                                                                                                                                                                                                                                                                                                                                                                                                                                                                                                                                                                                                                          |                                                        | HR (CI) | 1.21<br>(1.18, 1.25)                    | 1.28<br>(1.23, 1.34) | 1.27<br>(1.23, 1.31)  | 1.24<br>(1.16, 1.32) |
|                                                                                                                                                                                                                                                                                                                                                                                                                                                                                                                                                                                                                                                                                                                                                                                                                                                                                                                                          | 5 miles                                                | N       | 439,831                                 | 421,505              | 632,650               | 632,650              |
|                                                                                                                                                                                                                                                                                                                                                                                                                                                                                                                                                                                                                                                                                                                                                                                                                                                                                                                                          |                                                        | HR (CI) | 1.20<br>(1.15, 1.26)                    | 1.26<br>(1.19, 1.34) | 1.25<br>(1.19, 1.30)  | 1.24<br>(1.13, 1.36) |
| Time Varying                                                                                                                                                                                                                                                                                                                                                                                                                                                                                                                                                                                                                                                                                                                                                                                                                                                                                                                             | 30 miles                                               | N       | 792,995                                 | 758,292              | 1,155,167             | 1,155,167            |
|                                                                                                                                                                                                                                                                                                                                                                                                                                                                                                                                                                                                                                                                                                                                                                                                                                                                                                                                          |                                                        | HR (CI) | 1.29<br>(1.25, 1.33)                    | 1.43<br>(1.38, 1.49) | 1.38<br>(1.33, 1.42)  | 1.30<br>(1.20, 1.41) |
|                                                                                                                                                                                                                                                                                                                                                                                                                                                                                                                                                                                                                                                                                                                                                                                                                                                                                                                                          | 10 miles                                               | N       | 363,745                                 | 346,454              | 534,239               | 534,239              |
|                                                                                                                                                                                                                                                                                                                                                                                                                                                                                                                                                                                                                                                                                                                                                                                                                                                                                                                                          |                                                        | HR (CI) | 1.37<br>(1.31, 1.44)                    | 1.58<br>(1.49, 1.67) | 1.46<br>(1.39, 1.53)  | 1.29<br>(1.15, 1.46) |
|                                                                                                                                                                                                                                                                                                                                                                                                                                                                                                                                                                                                                                                                                                                                                                                                                                                                                                                                          | 5 miles                                                | N       | 163,548                                 | 155,230              | 241,553               | 241,553              |
|                                                                                                                                                                                                                                                                                                                                                                                                                                                                                                                                                                                                                                                                                                                                                                                                                                                                                                                                          |                                                        | HR (CI) | 1.39<br>(1.28, 1.51)                    | 1.55<br>(1.43, 1.69) | 1.44<br>(1.33, 1.55)  | 1.44<br>(1.19, 1.74) |
| <p>Models adjusted for age, race, gender, cancer, cardiovascular disease, chronic lung disease, diabetes mellitus, hyperlipidemia, hypertension, T<sub>0</sub> eGFR, body mass index, smoking status, ACEI/ARB use, county population density, number of outpatient eGFR measurements, number of hospitalizations, and county percent in poverty.</p> <p>+ Incident eGFR&lt;60 was evaluated in a subcohort of people with no prior history of eGFR≤60 at time of cohort entry.</p> <p>*Incident CKD was evaluated in a subcohort of people with at least 2 eGFR separated by at least 90 days apart who had no prior history eGFR≤60 at time of cohort entry.</p> <p>Abbreviations: PM<sub>2.5</sub>, particulate matter &lt;2.5 µm in aerodynamic diameter; CKD, Chronic Kidney Disease; eGFR, estimated glomerular filtration rate; ESRD, end stage renal disease; N, sample size; CI, 95% confidence interval; HR, hazard ratio.</p> |                                                        |         |                                         |                      |                       |                      |

**Supplemental table 3:** Risk of renal outcomes for every 10 µg/m<sup>3</sup> increase in PM<sub>2.5</sub> concentration in the top 100 counties with highest number of Census population.

| <b>PM<sub>2.5</sub> Exposure</b>                                                                                                                                                                                                                                                                                                                                                                                                                                                                                                                                                                                                                                                                                                                                                                                                                                                                                                         | <b>Measure</b> | <b>Incident eGFR Less Than 60<sup>+</sup></b> | <b>Incident CKD<sup>*</sup></b> | <b>≥ 30% Decline in eGFR</b> | <b>ESRD</b>          |
|------------------------------------------------------------------------------------------------------------------------------------------------------------------------------------------------------------------------------------------------------------------------------------------------------------------------------------------------------------------------------------------------------------------------------------------------------------------------------------------------------------------------------------------------------------------------------------------------------------------------------------------------------------------------------------------------------------------------------------------------------------------------------------------------------------------------------------------------------------------------------------------------------------------------------------------|----------------|-----------------------------------------------|---------------------------------|------------------------------|----------------------|
| Year 2004 Annual Average                                                                                                                                                                                                                                                                                                                                                                                                                                                                                                                                                                                                                                                                                                                                                                                                                                                                                                                 | N              | 499,916                                       | 478,244                         | 726,146                      | 726,146              |
|                                                                                                                                                                                                                                                                                                                                                                                                                                                                                                                                                                                                                                                                                                                                                                                                                                                                                                                                          | HR (CI)        | 1.20<br>(1.09, 1.33)                          | 1.30<br>(1.15, 1.47)            | 1.24<br>(1.10, 1.40)         | 1.22<br>(1.08, 1.38) |
| Time Varying                                                                                                                                                                                                                                                                                                                                                                                                                                                                                                                                                                                                                                                                                                                                                                                                                                                                                                                             | N              | 496,574                                       | 474,969                         | 721,629                      | 721,629              |
|                                                                                                                                                                                                                                                                                                                                                                                                                                                                                                                                                                                                                                                                                                                                                                                                                                                                                                                                          | HR (CI)        | 1.17<br>(1.04, 1.32)                          | 1.32<br>(1.13, 1.54)            | 1.24<br>(1.07, 1.42)         | 1.26<br>(1.07, 1.47) |
| <p>Models adjusted for age, race, gender, cancer, cardiovascular disease, chronic lung disease, diabetes mellitus, hyperlipidemia, hypertension, T<sub>0</sub> eGFR, body mass index, smoking status, ACEI/ARB use, county population density, number of outpatient eGFR measurements, number of hospitalizations, and county percent in poverty.</p> <p>+ Incident eGFR&lt;60 was evaluated in a subcohort of people with no prior history of eGFR≤60 at time of cohort entry.</p> <p>*Incident CKD was evaluated in a subcohort of people with at least 2 eGFR separated by at least 90 days apart who had no prior history eGFR≤60 at time of cohort entry.</p> <p>Abbreviations: PM<sub>2.5</sub>, particulate matter &lt;2.5 µm in aerodynamic diameter; eGFR, estimated glomerular filtration rate; CKD, Chronic Kidney Disease; ESRD, end stage renal disease; N, sample size; HR, hazard ratio; CI, 95% confidence interval.</p> |                |                                               |                                 |                              |                      |

**Supplemental table 4:** Risk of renal outcomes for every 10 µg/m<sup>3</sup> increase in PM<sub>2.5</sub> concentration using data from air monitoring stations within 5 miles from ZIP code centroid in analyses adjusting for city (termed city adjusted model), and analyses considering differences between and within cities (termed within city model).

| PM <sub>2.5</sub> Exposure | Model               | Measure              | Incident eGFR Less Than 60 <sup>+</sup> | Incident CKD*        | ≥ 30% Decline in eGFR | ESRD‡                | ESRD or ≥ 50% Decline in eGFR‡ |
|----------------------------|---------------------|----------------------|-----------------------------------------|----------------------|-----------------------|----------------------|--------------------------------|
| Year 2004 Annual Average   | N                   |                      | 420,818                                 | 403,196              | 604,777               | 604,777              | 604,777                        |
|                            | City Adjusted Model | HR (CI)              | 1.15<br>(1.07, 1.23)                    | 1.14<br>(1.06, 1.24) | 1.21<br>(1.14, 1.29)  | 1.02<br>(0.86, 1.20) | 1.33<br>(1.20, 1.48)           |
|                            | Within City Model   | Between-City HR (CI) | 1.24<br>(1.18, 1.29)                    | 1.31<br>(1.24, 1.39) | 1.27<br>(1.22, 1.33)  | 1.30<br>(1.17, 1.44) | 1.21<br>(1.14, 1.29)           |
|                            |                     | Within-City HR (CI)  | 1.13<br>(1.03, 1.23)                    | 1.12<br>(1.01, 1.25) | 1.19<br>(1.08, 1.30)  | 1.03<br>(0.86, 1.23) | 1.30<br>(1.12, 1.50)           |
| Time Varying               | N                   |                      | 157,059                                 | 149,033              | 231,831               | 231,831              | 231,831                        |
|                            | City Adjusted Model | HR (CI)              | 1.29<br>(1.18, 1.41)                    | 1.40<br>(1.26, 1.56) | 1.43<br>(1.31, 1.56)  | 1.33<br>(1.01, 1.76) | 1.27<br>(1.12, 1.44)           |
|                            | Within City Model   | Between-City HR (CI) | 1.45<br>(1.31, 1.60)                    | 1.61<br>(1.47, 1.77) | 1.45<br>(1.33, 1.58)  | 1.51<br>(1.21, 1.87) | 1.30<br>(1.13, 1.49)           |
|                            |                     | Within-City HR (CI)  | 1.18<br>(1.02, 1.36)                    | 1.31<br>(1.09, 1.58) | 1.42<br>(1.24, 1.64)  | 1.00<br>(0.65, 1.55) | 1.57<br>(1.24, 1.58)           |

Models adjusted for age, race, gender, cancer, cardiovascular disease, chronic lung disease, diabetes mellitus, hyperlipidemia, hypertension, T<sub>0</sub> eGFR, body mass index, smoking status, ACEI/ARB use, county population density, number of outpatient eGFR measurements, number of hospitalizations, and county percent in poverty.

+ Incident eGFR<60 was evaluated in a subcohort of people with no prior history of eGFR≤60 at time of cohort entry.

\*Incident CKD was evaluated in a subcohort of people with at least 2 eGFR separated by at least 90 days apart who had no prior history eGFR≤60 at time of cohort entry.

‡ Because the outcome of ESRD is rare, we considered the alternative composite end point of ESRD or ≥ 50% Decline in eGFR in these analyses.

Abbreviations: PM<sub>2.5</sub>, particulate matter <2.5 µm in aerodynamic diameter; eGFR, estimated glomerular filtration rate; CKD, Chronic Kidney Disease; ESRD, end stage renal disease; N, sample size; HR, hazard ratio; CI, 95% confidence interval.

**Supplemental table 5:** Risk of renal outcomes for every 10 µg/m<sup>3</sup> increase in PM<sub>2.5</sub> concentration while additionally controlling for 55 US county-level characteristics curated from the 2014 County Health Rankings datasets.

| Model                    | Measure | Incident eGFR Less Than 60 <sup>+</sup> | Incident CKD <sup>*</sup> | ≥ 30% Decline in eGFR | ESRD, Dialysis, or Transplant | ESRD or ≥ 50% Decline in eGFR <sup>‡</sup> |
|--------------------------|---------|-----------------------------------------|---------------------------|-----------------------|-------------------------------|--------------------------------------------|
| Year 2004 Annual Average | N       | 1,293,786                               | 1,242,895                 | 1,872,030             | 1872,030                      | 1,872,030                                  |
|                          | HR (CI) | 1.24<br>(1.13, 1.37)                    | 1.36<br>(1.20, 1.54)      | 1.29<br>(1.17, 1.42)  | 1.06<br>(0.95, 1.20)          | 1.31<br>(1.15, 1.49)                       |
| Time Varying             | N       | 1,288,132                               | 1,237,348                 | 1,864,389             | 1,864,389                     | 1,864,389                                  |
|                          | HR (CI) | 1.21<br>(1.11, 1.32)                    | 1.32<br>(1.19, 1.47)      | 1.27<br>(1.17, 1.39)  | 1.16<br>(1.05, 1.29)          | 1.26<br>(1.09, 1.44)                       |

Models adjusted for age, race, gender, cancer, cardiovascular disease, chronic lung disease, diabetes mellitus, hyperlipidemia, hypertension, T<sub>0</sub> eGFR, body mass index, smoking status, ACEI/ARB use, number of outpatient eGFR measurements, number of hospitalizations, and county level variables from the 2014 County Health Rankings dataset.

+ Incident eGFR<60 was evaluated in a subcohort of people with no prior history of eGFR≤60 at time of cohort entry.

\*Incident CKD was evaluated in a subcohort of people with at least 2 eGFR separated by at least 90 days apart who had no prior history eGFR≤60 at time of cohort entry.

‡ Because the outcome of ESRD is rare, we considered the alternative composite end point of ESRD or ≥ 50% Decline in eGFR in these analyses.

Abbreviations: PM<sub>2.5</sub>, particulate matter <2.5 µm in aerodynamic diameter; eGFR, estimated glomerular filtration rate; CKD, Chronic Kidney Disease; ESRD, end stage renal disease; N, sample size; HR, hazard ratio; CI, 95% confidence interval.

**Supplemental table 6:** Risk of renal outcomes for every 10 µg/m<sup>3</sup> increase in PM<sub>2.5</sub> concentration while controlling for expanded definition of diabetes and hypertension.

| Model                    | Measure | Incident eGFR Less Than 60 <sup>+</sup> | Incident CKD*        | ≥ 30% Decline in eGFR | ESRD, Dialysis, or Transplant |
|--------------------------|---------|-----------------------------------------|----------------------|-----------------------|-------------------------------|
| Year 2004 Annual Average | N       | 1,679,965                               | 1,616,153            | 2,444,157             | 2,444,157                     |
|                          | HR (CI) | 1.22<br>(1.15, 1.29)                    | 1.28<br>(1.19, 1.38) | 1.28<br>(1.19, 1.38)  | 1.24<br>(1.15, 1.33)          |
| Time Varying             | N       | 1,673,235                               | 1,609,552            | 2,435,073             | 2,435,073                     |
|                          | HR (CI) | 1.25<br>(1.18, 1.33)                    | 1.36<br>(1.26, 1.47) | 1.35<br>(1.26, 1.45)  | 1.27<br>(1.16, 1.39)          |

Models adjusted for age, race, gender, cancer, cardiovascular disease, chronic lung disease, diabetes mellitus, hyperlipidemia, hypertension, T<sub>0</sub> eGFR, body mass index, smoking status, ACEI/ARB use, county population density, number of outpatient eGFR measurements, number of hospitalizations, and county percent in poverty.

+ Incident eGFR<60 was evaluated in a subcohort of people with no prior history of eGFR≤60 at time of cohort entry.

\*Incident CKD was evaluated in a subcohort of people with at least 2 eGFR separated by at least 90 days apart who had no prior history eGFR≤60 at time of cohort entry.

Abbreviations: PM<sub>2.5</sub>, particulate matter <2.5 µm in aerodynamic diameter; eGFR, estimated glomerular filtration rate; CKD, Chronic Kidney Disease; ESRD, end stage renal disease; N, sample size; HR, hazard ratio; CI, 95% confidence interval.



**Supplemental Table 7:** Risk of rapid eGFR decline (eGFR Slope <-5 ml/min/1.73m<sup>2</sup>/year), and risk of composite renal outcome of ESRD or ≥50% decline in eGFR for every 10 µg/m<sup>3</sup> increase in PM<sub>2.5</sub> concentrations.

| Outcome                                                                                                                                                                                                                                                                                                                                                                                                                                                                                                                                                                                                                                                                                                                                                                                                                                   | PM <sub>2.5</sub> Exposure             | N         | Measure of Association (CI) |
|-------------------------------------------------------------------------------------------------------------------------------------------------------------------------------------------------------------------------------------------------------------------------------------------------------------------------------------------------------------------------------------------------------------------------------------------------------------------------------------------------------------------------------------------------------------------------------------------------------------------------------------------------------------------------------------------------------------------------------------------------------------------------------------------------------------------------------------------|----------------------------------------|-----------|-----------------------------|
| eGFR Slope <-5 ml/min/1.73m <sup>2</sup> /year                                                                                                                                                                                                                                                                                                                                                                                                                                                                                                                                                                                                                                                                                                                                                                                            | Year 2004<br>Annual Average: OR (CI)** | 819,984   | 1.35<br>(1.22, 1.50)        |
| Composite Outcome of ESRD or ≥50% Decline in eGFR                                                                                                                                                                                                                                                                                                                                                                                                                                                                                                                                                                                                                                                                                                                                                                                         | Year 2004<br>Annual Average: HR (CI)   | 2,482,737 | 1.29<br>(1.16, 1.44)        |
|                                                                                                                                                                                                                                                                                                                                                                                                                                                                                                                                                                                                                                                                                                                                                                                                                                           | Time Varying: HR (CI)                  | 2,473,531 | 1.34<br>(1.18, 1.52)        |
| <p>Models adjusted for age, race, gender, cancer, cardiovascular disease, chronic lung disease, diabetes mellitus, hyperlipidemia, hypertension, T<sub>0</sub> eGFR, body mass index, smoking status, ACEI/ARB use, county population density, number of outpatient eGFR measurements, number of hospitalizations, and county percent in poverty.<br/>                     *Odds ratio for slope is odds of rapid eGFR decline (eGFR Slope &lt;-5 ml/min/1.73m<sup>2</sup>/year) vs. stable decline (eGFR Slope &lt;0 to -1 ml/min/1.73m<sup>2</sup>/year)<br/>                     Abbreviations: PM<sub>2.5</sub>, particulate matter &lt;2.5 µm in aerodynamic diameter; N, sample size; eGFR, estimated glomerular filtration rate; OR, odds ratio; CI, 95% confidence interval; ESRD, end stage renal disease; HR, hazard ratio.</p> |                                        |           |                             |

**Supplemental table 8:** Risk of all-cause mortality for every 10 µg/m<sup>3</sup> increase in PM<sub>2.5</sub> concentration and by PM<sub>2.5</sub> quartiles

| Measure                                                                                                                                                                                                                                                                                                                                                                                                                                                                                                                                                                                                                                          | PM <sub>2.5</sub> Exposure |                      |
|--------------------------------------------------------------------------------------------------------------------------------------------------------------------------------------------------------------------------------------------------------------------------------------------------------------------------------------------------------------------------------------------------------------------------------------------------------------------------------------------------------------------------------------------------------------------------------------------------------------------------------------------------|----------------------------|----------------------|
|                                                                                                                                                                                                                                                                                                                                                                                                                                                                                                                                                                                                                                                  | Year 2004 Annual Average   | Time Varying         |
| N                                                                                                                                                                                                                                                                                                                                                                                                                                                                                                                                                                                                                                                | 2,482,737                  | 2,473,531            |
| A 10 µg/m <sup>3</sup> increase in PM <sub>2.5</sub><br>HR<br>(CI)                                                                                                                                                                                                                                                                                                                                                                                                                                                                                                                                                                               | 1.13<br>(1.07, 1.19)       | 1.24<br>(1.18, 1.31) |
| Quartile 2<br>HR (CI)                                                                                                                                                                                                                                                                                                                                                                                                                                                                                                                                                                                                                            | 1.07<br>(1.04, 1.11)       | 1.07<br>(1.05, 1.10) |
| Quartile 3<br>HR (CI)                                                                                                                                                                                                                                                                                                                                                                                                                                                                                                                                                                                                                            | 1.09<br>(1.06, 1.12)       | 1.08<br>(1.05, 1.11) |
| Quartile 4<br>HR (CI)                                                                                                                                                                                                                                                                                                                                                                                                                                                                                                                                                                                                                            | 1.12<br>(1.09, 1.16)       | 1.13<br>(1.11, 1.16) |
| <p>Models adjusted for age, race, gender, cancer, cardiovascular disease, chronic lung disease, diabetes mellitus, hyperlipidemia, hypertension, T<sub>0</sub> eGFR, body mass index, ACEI/ARB use, county population density, number of outpatient eGFR measurements, number of hospitalizations, and county percent in poverty.</p> <p>Quartile 1, consisting of those living in counties with the lowest PM<sub>2.5</sub>, is the reference category for quartile measures.</p> <p>Abbreviations: PM<sub>2.5</sub>, particulate matter &lt;2.5 µm in aerodynamic diameter; N, sample size; HR, hazard ratio; CI, 95% confidence interval.</p> |                            |                      |

**Supplemental table 9:** Risk of hospital admission due to myocardial infarction for every 10  $\mu\text{g}/\text{m}^3$  increase in  $\text{PM}_{2.5}$  concentrations:

| Measure                                                                                                                                                                                                                                                                                                                                                                                                                                                                                                                                                                                                     | $\text{PM}_{2.5}$ Exposure  |                      |
|-------------------------------------------------------------------------------------------------------------------------------------------------------------------------------------------------------------------------------------------------------------------------------------------------------------------------------------------------------------------------------------------------------------------------------------------------------------------------------------------------------------------------------------------------------------------------------------------------------------|-----------------------------|----------------------|
|                                                                                                                                                                                                                                                                                                                                                                                                                                                                                                                                                                                                             | Year 2004<br>Annual Average | Time Varying         |
| N                                                                                                                                                                                                                                                                                                                                                                                                                                                                                                                                                                                                           | 2,482,737                   | 2,473,531            |
| A 10 $\mu\text{g}/\text{m}^3$ increase in $\text{PM}_{2.5}$<br>HR<br>(CI)                                                                                                                                                                                                                                                                                                                                                                                                                                                                                                                                   | 1.16<br>(1.01, 1.32)        | 1.25<br>(1.17, 1.46) |
| <p>Models adjusted for age, race, gender, cancer, chronic lung disease, diabetes mellitus, hyperlipidemia, hypertension, <math>\text{T}_0</math> eGFR, body mass index, smoking status, ACEI/ARB use, county population density, number of outpatient eGFR measurements, number of hospitalizations, county percent in poverty, and prior history of myocardial infarction.</p> <p>Abbreviations: <math>\text{PM}_{2.5}</math>, particulate matter &lt;2.5 <math>\mu\text{m}</math> in aerodynamic diameter; eGFR, estimated glomerular filtration rate; HR, hazard ratio; CI, 95% confidence interval.</p> |                             |                      |

**Supplemental table 10:** Risk of renal outcomes for every 10 µg/m<sup>3</sup> increase in PM<sub>2.5</sub> concentration using informative censoring sensitivity analysis for competing risk models.

| <b>PM<sub>2.5</sub> Exposure</b> | <b>Measure</b>                               | <b>Incident eGFR Less Than 60<sup>+</sup></b> | <b>Incident CKD<sup>*</sup></b> | <b>≥ 30% Decline in eGFR</b> | <b>ESRD</b>          |
|----------------------------------|----------------------------------------------|-----------------------------------------------|---------------------------------|------------------------------|----------------------|
| Year 2004 Annual Average         | N                                            | 1,709,761                                     | 1,644,351                       | 2,482,737                    | 2,482,737            |
|                                  | Censoring as a Risk <sup>**</sup><br>HR (CI) | 1.17<br>(1.11, 1.24)                          | 1.19<br>(1.12, 1.27)            | 1.22<br>(1.14, 1.31)         | 1.13<br>(1.07, 1.20) |
| Time Varying                     | N                                            | 1,702,923                                     | 1,637,643                       | 2,473,531                    | 2,473,531            |
|                                  | Censoring as a Risk <sup>**</sup><br>HR (CI) | 1.27<br>(1.19, 1.35)                          | 1.36<br>(1.27, 1.46)            | 1.34<br>(1.25, 1.44)         | 1.29<br>(1.23, 1.34) |

Models adjusted for age, race, gender, cancer, cardiovascular disease, chronic lung disease, diabetes mellitus, hyperlipidemia, hypertension, T<sub>0</sub> eGFR, body mass index, smoking status, ACEI/ARB use, county population density, number of outpatient eGFR measurements, number of hospitalizations, and county percent in poverty.

+ Incident eGFR<60 was evaluated in a subcohort of people with no prior history of eGFR≤60 at time of cohort entry.

\*Incident CKD was evaluated in a subcohort of people with at least 2 eGFR separated by at least 90 days apart who had no prior history eGFR≤60 at time of cohort entry.

\*\* Censoring as a Risk: Model treats censoring at a competing risk as an event

Abbreviations: PM<sub>2.5</sub>, particulate matter <2.5 µm in aerodynamic diameter; eGFR, estimated glomerular filtration rate; CKD, Chronic Kidney Disease; ESRD, end stage renal disease; N, sample size; HR, hazard ratio; CI, 95% confidence interval.

**Supplemental table 11:** Risk of renal outcomes for every one IQR increase in ambient air sodium concentrations (0.046416 µg/m<sup>3</sup>)

| Sodium Exposure          | Measure   | Incident eGFR Less Than 60 <sup>+</sup> | Incident CKD*        | ≥ 30% Decline in eGFR | ESRD                 | Death                |
|--------------------------|-----------|-----------------------------------------|----------------------|-----------------------|----------------------|----------------------|
| Year 2004 Annual Average | N         | 948,202                                 | 909,229              | 1,368,122             | 1,368,122            | 1,368,122            |
|                          | HR (CI)** | 0.99<br>(0.99, 1.00)                    | 0.99<br>(0.98, 0.99) | 0.99<br>(0.98, 1.00)  | 1.01<br>(1.00, 1.02) | 1.00<br>(1.00, 1.01) |
| Time Varying             | N         | 946,991                                 | 908,219              | 1,366,479             | 1,366,692            | 1,366,692            |
|                          | HR (CI)** | 0.99<br>(0.99, 0.99)                    | 0.99<br>(0.98, 0.99) | 0.99<br>(0.99, 0.99)  | 1.01<br>(1.00, 1.02) | 1.00<br>(0.99, 1.00) |

Models adjusted for age, race, gender, cancer, cardiovascular disease, chronic lung disease, diabetes mellitus, hyperlipidemia, hypertension, T<sub>0</sub> eGFR, body mass index, smoking status, ACEI/ARB use, county population density, number of outpatient eGFR measurements, number of hospitalizations, and county percent in poverty.  
+ Incident eGFR<60 was evaluated in a subcohort of people with no prior history of eGFR≤60 at time of cohort entry.  
\*Incident CKD was evaluated in a subcohort of people with at least 2 eGFR separated by at least 90 days apart who had no prior history eGFR≤60 at time of cohort entry.  
Abbreviations: PM<sub>2.5</sub>, particulate matter <2.5 µm in aerodynamic diameter; eGFR, estimated glomerular filtration rate; CKD, Chronic Kidney Disease; ESRD, end stage renal disease; N, sample size; HR, hazard ratio; CI, 95% confidence interval.  
\*\*Represents for every one IQR increase in sodium (0.046416 µg/m<sup>3</sup>)

## **Supplemental Methods:**

### **Data Sources:**

We utilized Department of Veterans Affairs datasets including inpatient and outpatient medical SAS datasets (that contain utilization data related to inpatient and outpatient encounters within the VA system) to ascertain patient demographic characteristics, location based on Federal Information Processing Standard (FIPS) county codes, and comorbidity information based on Current Procedural Terminology (CPT) codes, and ICD-9-CM diagnostic and procedure codes corresponding to inpatient and outpatient encounters<sup>1-4</sup>. The VA Decision Support System Laboratory Results file (a detailed database that includes VA-wide results for select laboratory tests obtained in the clinical setting) supplied data on outpatient and inpatient serum creatinine measurements, which were collected during routine medical care<sup>1, 2, 5</sup>. The VA Vital Status and Beneficiary Identification Records Locator Subsystem (BIRLS) files furnished demographic characteristics and death follow-up through September 30, 2012<sup>1, 2</sup>. Data from the United States Renal Database System (USRDS) obtained through the VA/Centers for Medicare and Medicaid Services (CMS) was utilized in assessing ESRD status<sup>6</sup>. The Corporate Data Warehouse (CDW) dataset provided data on body mass index (BMI) and systolic blood pressure, smoking status, and angiotensin-converting enzyme inhibitors (ACEIs) / angiotensin receptor blockers (ARBs) and diabetic medication (including oral hypoglycemic agents and insulin) use from the Vital Signs, Health Factors, and RX Outpatient domains, respectively. The Census Bureau's Model-based Small Area Income & Poverty Estimates (SAIPE) supplied annual estimates of county level percent in poverty<sup>7</sup>. Information on county level population density and population size was obtained from the 2000 Census of Population and Housing<sup>7</sup>. Latitude and longitude for ZIP code tabulation area was obtained from the 2000 Census Gazetteer File<sup>8</sup>. Data on the link between ZIP code and metropolitan statistical area (MSA) was obtained from the ZIP Code to Core Based Statistical Area Relationship File based on the Office of Management and Budget 2006 delineation of MSA from the US Census Bureau<sup>9</sup>.

### **Covariates:**

Race/ethnicity was categorized as white, black, or other (Latino, Asian, Native American, or other racial/ethnic minority groups). Comorbidities were assigned on the basis of relevant ICD-9-CM diagnostic and procedures codes and CPT codes in the VA Medical SAS datasets using definitions validated for use in VA datasets<sup>10-13</sup>.

BMI was categorized into underweight (<18.50), normal weight (18.50-24.99), overweight (25.00-29.99), and obese (≥30.00). Smoking status was defined as current, former, or never smoker. ACEI/ARB use was defined as use if there were prescriptions for 90 days or greater during the time before T<sub>0</sub>. Number of outpatient eGFR measurements represented the cumulative number of outpatient eGFR values from October 1, 1999 to T<sub>0</sub>. Number of hospitalizations was derived from the cumulative number of inpatient stays lasting a full day or longer from October 1, 1999 to T<sub>0</sub>. Population density and percent in poverty were assigned based on county of residence at T<sub>0</sub>.

### PM<sub>2.5</sub> exposure definition for NASA based data

We considered NASA's spaceborne satellite sensors as an additional source to capture ambient PM<sub>2.5</sub> exposure. NASA's SEDAC Global Annual PM<sub>2.5</sub> Grids from MODIS, MISR and SeaWiFS Aerosol Optical Depth (AOD) provided the data on PM<sub>2.5</sub> estimates at the 10x10 km resolution<sup>14, 15</sup>. Data is available in three year medians every year from 2003-2011. Patients were censored on Dec 31, 2011 in time varying models. Overlap of 10x10 km resolution PM<sub>2.5</sub> grids and zip code's geographic area, resulting in surface area weighted PM<sub>2.5</sub> values for each zip code, was used to define exposure levels (as depicted in the figure below).

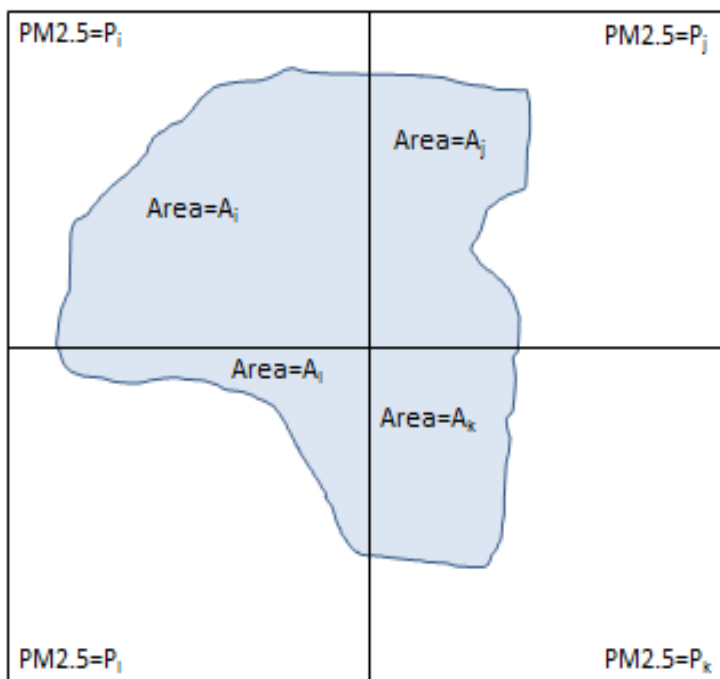

Area weighted PM<sub>2.5</sub> exposure assigned to the above zip code is calculated as:

$$\frac{P_i A_i + P_j A_j + P_k A_k + P_l A_l}{A_i + A_j + A_k + A_l}$$

where P<sub>x</sub> is the PM<sub>2.5</sub> value for grid X, and A<sub>x</sub> the area of overlap between the zip code and grid X

## Population Attributable Fraction (PAF) and Attributable Burden of Disease (ABD):

PAF was calculated using piecewise constant hazard models for disease incidence<sup>16, 17</sup>. The PAF for incidence of disease was obtained from the formula:

$$PAF(T^D \leq \min(T^M, a_j)) = 1 - \frac{\sum_{i=1}^n \sum_{j=1}^J \frac{\lambda_{ij}^{*D}}{\lambda_{ij}^{*D} + \lambda_{ij}^{*M}} (S_{i,j-1}^* - S_{ij}^*)}{\sum_{i=1}^n \sum_{j=1}^J \frac{\lambda_{ij}^D}{\lambda_{ij}^D + \lambda_{ij}^M} (S_{i,j-1} - S_{ij})}$$

where D indicates disease, M mortality, n the number of individuals in analysis, J the number of intervals,  $a_j$  the survival time,  $\lambda_{ij}^O$  the hazard of incident outcome O for person i and interval j, \* indicates the values at the Theoretical Minimum Exposure Level (TMREL), and S the disease free survival from  $S_{ij} = S_{ij}^D S_{ij}^M = e^{-\sum_{k=1}^j (\lambda_{ik}^D + \lambda_{ik}^M)(a_k - a_{k-1})}$ . The TMREL used for PM<sub>2.5</sub> was 12 ug/m<sup>3</sup> for those with an exposure above 12 ug/m<sup>3</sup>, and the existing level of exposure for those at or under 12 ug/m<sup>3</sup>. PAF was estimated using the annual average 2004 PM<sub>2.5</sub> data. Burden of disease, as the number of incident outcomes per year attributable to PM<sub>2.5</sub> exposure above the EPA standard of 12 ug/m<sup>3</sup>, was calculated using literature based estimates of outcome incident rates in the United States<sup>6, 18</sup> and the 2000 Census contiguous US population, from the equation  $ABD = PAF * IR * population$ , where ABD is the attributable burden of disease, PAF is the population attributable, IR is the incident rate of the outcome, and population in which the burden is being assessed<sup>19</sup>. ABD was additionally calculated using a TMREL defined according to the Global Burden of Disease study methodologies<sup>20-22</sup>. This TMREL was assigned based on a uniform distribution of PM<sub>2.5</sub> from 2.4–5.9 µg/m<sup>3</sup> representing exposure values between the minimum and fifth percentiles of exposure distributions from outdoor air pollution cohort studies<sup>20-22</sup>. As elegantly articulated by Lim et al. the TMREL by its definition should minimize individual (and population level) risk and be *theoretically* possible to achieve, but not necessarily affordable or feasible to achieve<sup>22</sup>. Maps of the ABD per 100,000 population of incident CKD in each county were generated. Burden of disease uncertainty intervals were based on PAF variance.

## Spline analyses:

Cubic spline analyses were performed in adjusted cox proportional hazard regression models with knots placed at PM<sub>2.5</sub> quartiles<sup>23</sup> using 2004 monitor and modeled data. One percent of counties at each tail end of



the county PM<sub>2.5</sub> distribution were excluded to reduce influence of potential outliers. For all splines the lowest PM<sub>2.5</sub> value included in analyses, 5.7 µg/m<sup>3</sup>, was used as the reference.

### **Sensitivity analyses:**

To test robustness of study findings we undertook a number of sensitivity analyses where we: a) Repeated the primary analyses, assigning PM<sub>2.5</sub> exposure to each cohort participant based upon the nearest air monitoring station to their residential ZIP code centroid. Distance to nearest monitoring station was calculated using the Haversine formula, the latitude and longitude of the station, and the latitude and longitude of the cohort participant's ZIP code tabulation area<sup>24</sup>. The analyses were restricted to those who were within 30 miles of the station. Participants were excluded in time varying models if they were considered >30 miles away from a monitoring station at any time. We then repeated this process and further reduced the distance threshold where we assigned exposure to those residing within 10, and 5 miles of air monitoring station;

b) repeated analyses in those who lived in counties which had a population size in the top 100 of all counties in the United States; c) analyzed exposure to assess within city effects in those who lived within 5 miles of an air monitoring station, where city was defined by MSA, using two methods: 1- termed the "city adjusted" model where an indicator variable for MSA was included in the models; 2- termed the "within-city model", used a city wide mean parameter (for between city effects) and a difference from city mean parameter (for within city effects)<sup>25</sup>. Further details on "city-adjusted" and "within-city analyses" are provided in the section below; d) we additionally controlled for 55 US county-level characteristics using the 2014 County Health Rankings (CHR) Datasets<sup>26, 27</sup>; county-level variables describe domains including demographics, physical environment, social and economic factors, health behaviors, clinical care, and health outcomes; only variables that were comparable across state were included (and listed in the County Health Rankings section below). Population density and poverty variables used in the primary analyses were excluded as the CHR data includes similar variables; the air pollution measure in the CHR datasets was also excluded as it would overlap with the primary predictor (PM<sub>2.5</sub>). A principal component analysis was first conducted on the CHR data to address multicollinearity between the county level characteristics, and then factor scores were computed and controlled for in analyses. e) conducted analyses controlling for more sensitive definitions of hypertension and diabetes; the definition of hypertension included relevant diagnostic codes and average systolic blood pressure (treated

as a continuous variable) in the year prior to  $T_0$ ; the definition of diabetes included relevant diagnostic codes as well as use of diabetic medications (including oral hypoglycemic agents and insulin) and HbA1c levels  $>6.4$ . f) examined the association of  $PM_{2.5}$  concentrations and the alternative renal outcome of rapid eGFR decline defined as eGFR slope  $<-5$  ml/min/1.73m<sup>2</sup>/year, where odds of rapid eGFR decline was compared to stable eGFR decline (eGFR slope  $<0$  to  $-1$  ml/min per 1.73 m<sup>2</sup>/year) using a logistic regression model with the generalized estimating equation method to account for intra-county correlation<sup>13</sup>; g) examined the association of  $PM_{2.5}$  concentrations and the alternative composite renal outcome of ESRD, dialysis, kidney transplant, or  $\geq 50\%$  decline in eGFR; i) as a measure of calibration, analyzed the association between  $PM_{2.5}$  and risk of all-cause mortality (as a positive control) using continuous and quartile exposure definitions; j) considered the risk of myocardial infarction (MI) as an additional positive control, where MI was defined as hospital admission due to myocardial infarction (inpatient admission with a primary diagnosis ICD-9 code of 410.\*)<sup>28</sup>, while additionally controlling for prior history of MI k) conducted sensitivity analyses for the competing risk of death<sup>29</sup>; l) analyzed exposure to sodium, in baseline and time varying models, and its association with the kidney disease outcomes and death. Sodium exposure was assigned based on the nearest air monitoring station with a sodium measure within 30 miles of a participant's residential zip code's centroid, and was assessed for every 1 IQR (0.046  $\mu\text{g}/\text{m}^3$ , based on 2004 distribution) increase.

### **City adjusted and within-city models:**

For city adjusted and within-city models Cox proportional hazard models with a robust sandwich estimator were used.

#### City Adjusted Model

City adjusted models were built by incorporating a city indicator, using the following equation for the hazard at time  $t$   $\lambda(t)$ :

$$\lambda(t) = \lambda_0 e^{\beta_1 X_i + \beta_2 C + \gamma Z_i}$$

where  $\lambda_0$  is the baseline hazard,  $\beta_1$  the coefficient for  $PM_{2.5}$  exposure  $X$  for individual  $i$ ,  $\beta_2$  the coefficient for city  $C$  (the city indicator), and  $\gamma$  the vector of coefficients for covariates  $Z$  for individual  $i$ .

### Within-city Model

For within-city models, PM<sub>2.5</sub> exposures of all subjects living in zip codes that fell within a city were averaged, providing a “city mean,”  $\bar{X}_j$ . For time varying models the city mean was calculated at the beginning of each year. Within-city models were fit using an equation for the hazard at time t for person i in city j  $\lambda_{ij}(t)$ :

$$\lambda_{ij}(t) = \lambda_0(t)e^{\beta_B \bar{X}_j + \beta_W (X_{ij} - \bar{X}_j) + \gamma Z_i}$$

where  $\lambda_0$  is the baseline hazard,  $\beta_B$  (the between city effect) the coefficient for city j’s mean PM<sub>2.5</sub> exposure  $\bar{X}_j$ ,  $\beta_W$  (the within city effect) the coefficient for the difference between the individual i in city j’s PM<sub>2.5</sub> exposure  $X_{ij}$  and the city j’s mean PM<sub>2.5</sub> exposure  $\bar{X}_j$ , and  $\gamma$  the vector of coefficients for covariates Z for individual i.

### County Health Rankings<sup>26, 27</sup>:

County Health Rankings county level variable definitions and data sources.

| Variable                                 | Source                      | Definition                                                                  | Dates |
|------------------------------------------|-----------------------------|-----------------------------------------------------------------------------|-------|
| <b>Demographics</b>                      |                             |                                                                             |       |
| Population                               | Census Population Estimates | Number of people in a county                                                | 2012  |
| % below 18 years of age                  | Census Population Estimates | Percentage of the population below 18 years of age                          | 2012  |
| % 65 and older                           | Census Population Estimates | Percentage of the population 65 or older                                    | 2012  |
| % Non-Hispanic African American          | Census Population Estimates | Percentage of the population who are Non-Hispanic African American          | 2012  |
| % American Indian and Alaska Native      | Census Population Estimates | Percentage of the population who are American Indian and Alaska Native      | 2012  |
| % Asian                                  | Census Population Estimates | Percentage of the population who are Asian                                  | 2012  |
| % Native Hawaiian/Other Pacific Islander | Census Population Estimates | Percentage of the population who are Native Hawaiian/Other Pacific Islander | 2012  |
| % Hispanic                               | Census Population Estimates | Percentage of the population who are Hispanic                               | 2012  |

|                                      |                                                   |                                                                                                                                             |              |
|--------------------------------------|---------------------------------------------------|---------------------------------------------------------------------------------------------------------------------------------------------|--------------|
| % Non-Hispanic White                 | Census Population Estimates                       | Percentage of the population who are Non-Hispanic White                                                                                     | 2012         |
| % not proficient in English          | American Community Survey, 5-year estimates       | Percentage of the population not proficient in the English language                                                                         | 2008-2012    |
| % Females                            | Census Population Estimates                       | Percentage of the population who are female                                                                                                 | 2012         |
| % Rural                              | Census Population Estimates                       | Percentage of the population living in a rural area                                                                                         | 2012         |
| <b>Physical Environment</b>          |                                                   |                                                                                                                                             |              |
| Drinking water violations            | Safe Drinking Water Information System            | Population affected by a water violation/Total population with public water                                                                 | FY 2012-2013 |
| Severe housing problems              | HUD, Comprehensive Housing Affordability Strategy | Percentage of households with at least 1 of 4 housing problems: overcrowding, high housing costs, or lack of kitchen or plumbing facilities | 2006-2010    |
| Driving alone to work                | American Community Survey                         | Percent of people who drive alone to work                                                                                                   | 2008-2012    |
| Long commute - driving alone         | American Community Survey                         | Among workers who commute in their car alone, the percentage that commute more than 30 minutes                                              | 2008-2012    |
| <b>Social and economic factors</b>   |                                                   |                                                                                                                                             |              |
| Some college                         | American Community Survey                         | Percent adults age 25-44 with some post-secondary education                                                                                 | 2008-2012    |
| Unemployment                         | Bureau of Labor Statistics                        | Percent of population age 16+ unemployed and looking for work                                                                               | 2012         |
| Children in poverty                  | Small Area Income and Poverty Estimates           | Percent of children (under age 18) living in poverty                                                                                        | 2012         |
| Inadequate Social Support            | Behavioral Risk Factor Surveillance System        | Percent of adults that report not getting social/emotional support                                                                          | 2005-2010    |
| Children in single-parent households | American Community Survey                         | Percent of children that live in single-parent households                                                                                   | 2008-2012    |
| Injury deaths                        | CDC WONDER                                        | Injury mortality rate per 100,000                                                                                                           | 2006-2010    |
| Median household income              | Small Area Income and Poverty Estimates           | Median household income at which half the households earn                                                                                   | 2012         |

|                                  |                                                                                        |                                                                                            |             |
|----------------------------------|----------------------------------------------------------------------------------------|--------------------------------------------------------------------------------------------|-------------|
|                                  |                                                                                        | more and half the households earn less                                                     |             |
| Children eligible for free lunch | National Center for Education Statistics                                               | Percentage of children enrolled in public schools eligible for free lunch                  | 2011        |
| Homicide rate                    | National Center for Health Statistics                                                  | Number of deaths from assaults per 100,000 population                                      | 2004-2010   |
| <b>Health Behaviors</b>          |                                                                                        |                                                                                            |             |
| Adult smoking                    | Behavioral Risk Factor Surveillance System                                             | Percent of adults that reported currently smoking                                          | 2006-2012   |
| Access to exercise opportunities | OneSource Global Business Browser, Delorme map data, ESRI, & US Census Tigerline Files | Percentage of the population with access to places for physical activity                   | 2010 & 2012 |
| Excessive drinking               | Behavioral Risk Factor Surveillance System                                             | Percent of adults that report excessive drinking                                           | 2006-2012   |
| Alcohol-impaired driving deaths  | Fatality Analysis Reporting System                                                     | Percent of driving deaths with alcohol involvement                                         | 2008-2012   |
| Teen births                      | National Center for Health Statistics                                                  | Teen births / females ages 15-19 * 1,000                                                   | 2005-2011   |
| Limited access to healthy foods  | USDA Food Environment Atlas                                                            | Percentage of the population who are low income and do not live close to a grocery store   | 2010        |
| Motor vehicle crash deaths       | National Center for Health Statistics                                                  | Number of deaths due to traffic accidents involving a motor vehicle per 100,000 population | 2004-2010   |
| Drug poisoning deaths            | CDC WONDER mortality data                                                              | Number of deaths due to drug poisoning per 100,000 population                              | 2004-2010   |
| <b>Clinical Care</b>             |                                                                                        |                                                                                            |             |
| Uninsured                        | Small Area Health Insurance Estimates                                                  | Percent of population < 65 without insurance                                               | 2011        |
| Primary care physicians          | HRSA Area Resource Rile                                                                | Number of primary care physicians per 100,000 population                                   | 2011        |
| Dentists                         | HRSA Area Resource Rile                                                                | Number of dentists per 100,000 population                                                  | 2012        |
| Mental health providers          | CMS, National Provider Identification                                                  | Number of mental health providers per 100,000 population                                   | 2013        |
| Preventable hospital stays       | Medicare/Dartmouth Institute                                                           | Discharges for ambulatory care sensitive                                                   | 2011        |

|                                   |                                                                                                       |                                                                                       |           |
|-----------------------------------|-------------------------------------------------------------------------------------------------------|---------------------------------------------------------------------------------------|-----------|
|                                   |                                                                                                       | conditions/Medicare Enrollees * 1,000                                                 |           |
| Diabetic monitoring               | Medicare/Dartmouth Institute                                                                          | Percent of Diabetic Medicare enrollees receiving HbA1c test                           | 2011      |
| Mammography screening             | Medicare/Dartmouth Institute                                                                          | Percent of female Medicare enrollees having at least 1 mammogram in 2 yrs (age 67-69) | 2011      |
| Uninsured adults                  | Small Area Health Insurance Estimates                                                                 | Percentage of the population ages 18 to 65 that has no health insurance coverage      | 2011      |
| Uninsured children                | Small Area Health Insurance Estimates                                                                 | Percentage of the population under age 19 that has no health insurance coverage       | 2011      |
| Health Care Costs                 | Dartmouth Atlas of Health Care                                                                        | Price-adjusted Medicare reimbursements (part A and B) per enrollee                    | 2011      |
| Could not see doctor due to costs | Behavioral Risk Factor Surveillance System                                                            | Percentage of the population who could not see a doctor due to costs                  | 2006-2012 |
| Other primary care providers      | CMS, National Provider Identification                                                                 | Number of other primary care providers per the population of a county                 | 2013      |
| <b>Health Outcomes</b>            |                                                                                                       |                                                                                       |           |
| Premature death                   | National Center for Health Statistics                                                                 | Age-adjusted years of potential life lost (YPLL) rate per 100,000                     | 2008-2010 |
| Poor or fair health               | Behavioral Risk Factor Surveillance System                                                            | Percent of adults that report fair or poor health (age-adjusted)                      | 2006-2012 |
| Poor physical health days         | Behavioral Risk Factor Surveillance System                                                            | Average number of reported physically unhealthy days per month                        | 2006-2012 |
| Poor mental health days           | Behavioral Risk Factor Surveillance System                                                            | Average number of reported mentally unhealthy days per month                          | 2006-2012 |
| Low birthweight                   | National Center for Health Statistics                                                                 | Percent of births with low birth weight (<2500g)                                      | 2005-2011 |
| Diabetes                          | National Center for Chronic Disease Prevention and Health Promotion, Division of Diabetes Translation | Prevalence of diagnosed diabetes in a given county                                    | 2010      |
| HIV prevalence rate               | National Center for HIV/AIDS, Viral                                                                   | Number of diagnoses cases of HIV in a                                                 | 2010      |

|                                  |                                   |                                                                                  |           |
|----------------------------------|-----------------------------------|----------------------------------------------------------------------------------|-----------|
|                                  | Hepatitis, STD, and TB prevention | county per 100,000 population                                                    |           |
| Premature age-adjusted mortality | CDC WONDER mortality data         | Number of deaths among residents under the age of 75 per 100,000 population      | 2008-2010 |
| Infant mortality                 | Health Indicators Warehouse       | Number of deaths among children less than one year of age per 100,000 population | 2002-2008 |
| Child mortality                  | CDC WONDER mortality data         | Number of deaths among children under age 18 per 100,000 population              | 2007-2010 |

## References:

1. Murphy, PA, Cowper, DC, Seppala, G, Stroupe, KT, Hynes, DM: Veterans Health Administration inpatient and outpatient care data: an overview. *Effective clinical practice : ECP*, 5: E4, 2002.
2. Oddone, EZ, Eisen, S: Veterans Affairs Research and Development: using science to improve health care for veterans. *North Carolina medical journal*, 69: 35-37, 2008.
3. VIREC Research User Guide: VHA Medical SAS® Outpatient Datasets FY2006. U.S. Department of Veterans Affairs. VA Information Resource Center: Hines, I, September 2007.
4. VIREC Research User Guide: VHA Medical SAS® Inpatient Datasets FY2006. U.S. Department of Veterans Affairs. VA Information Resource Center: Hines, I, September 2007.
5. VIREC Research User Guide: Veterans Health Administration Decision Support System Clinical National Data Extracts, H, IL, U.S. Department of Veterans Affairs. VA Information Resource Center September 2009.
6. Saran, R, Li, Y, Robinson, B, Abbott, KC, Agodoa, LY, Ayanian, J, Bragg-Gresham, J, Balkrishnan, R, Chen, JL, Cope, E, Eggers, PW, Gillen, D, Gipson, D, Hailpern, SM, Hall, YN, He, K, Herman, W, Heung, M, Hirth, RA, Hutton, D, Jacobsen, SJ, Kalantar-Zadeh, K, Kovesdy, CP, Lu, Y, Molnar, MZ, Morgenstern, H, Nallamothu, B, Nguyen, DV, O'Hare, AM, Plattner, B, Pisoni, R, Port, FK, Rao, P, Rhee, CM, Sakhuja, A, Schaubel, DE, Selewski, DT, Shahinian, V, Sim, JJ, Song, P, Streja, E, Kurella Tamura, M, Tentori, F, White, S, Woodside, K, Hirth, RA: US Renal Data System 2015 Annual Data Report: Epidemiology of Kidney Disease in the United States. *American journal of kidney diseases : the official journal of the National Kidney Foundation*, 67: A7-8, 2016.
7. 2000 Census of Population and Housing, Population and Housing Unit Counts PHC-3-1. In: BUREAU, U. S. C. (Ed.) United States Summary Washington, DC, 2004.
8. Census 2000 U.S. Gazetteer Files, <http://www.census.gov/geo/maps-data/data/gazetteer2000.html>. In: (2000), U. S. C. B. (Ed.).
9. <https://www.census.gov/population/metro/data/other.html>.
10. Bowe, B, Xie, Y, Xian, H, Balasubramanian, S, Al-Aly, Z: Low levels of high-density lipoprotein cholesterol increase the risk of incident kidney disease and its progression. *Kidney international*, 89: 886-896, 2016.
11. Yan Xie, BB, Hong Xian, Sumitra Balasubramanian, Ziyad Al-Aly: GFR Trajectories of People Entering Stage 4 CKD and Subsequent Kidney Disease Outcomes and Mortality. *American Journal of Kidney Diseases*, 2016.
12. Al-Aly, Z, Balasubramanian, S, McDonald, JR, Scherrer, JF, O'Hare, AM: Greater variability in kidney function is associated with an increased risk of death. *Kidney international*, 82: 1208-1214, 2012.
13. Xie, Y, Bowe, B, Xian, H, Balasubramanian, S, Al-Aly, Z: Rate of Kidney Function Decline and Risk of Hospitalizations in Stage 3A CKD. *Clinical journal of the American Society of Nephrology : CJASN*, 10: 1946-1955, 2015.
14. van Donkelaar, A, Martin, RV, Brauer, M, Boys, BL: Use of Satellite Observations for Long-term Exposure Assessment of Global Concentrations of Fine Particulate Matter. *Environmental Health Perspectives*, 123: 135-143, 2015.
15. van Donkelaar, A, Martin, RV, Brauer, M, Boys, BL: Global Annual PM2.5 Grids from MODIS, MISR and SeaWiFS Aerosol Optical Depth (AOD), 1998-2012. Palisades, NY, NASA Socioeconomic Data and Applications Center (SEDAC), 2015.
16. Laaksonen, MA, Virtala, E., Knekt, P., Oja, H., & Härkänen, T. : SAS Macros for calculation of population attributable fraction in a cohort study design. *Journal of Statistical Software*, 43, 2011.
17. Collaborators, GBDRF: Global, regional, and national comparative risk assessment of 79 behavioural, environmental and occupational, and metabolic risks or clusters of risks, 1990-2015: a systematic analysis for the Global Burden of Disease Study 2015. *Lancet*, 388: 1659-1724, 2016.
18. Centers for Disease Control and Prevention. Chronic Kidney Disease Surveillance System—United States.
19. Lelieveld, J, Evans, JS, Fnais, M, Giannadaki, D, Pozzer, A: The contribution of outdoor air pollution sources to premature mortality on a global scale. *Nature*, 525: 367-371, 2015.



20. Cohen, AJ, Brauer, M, Burnett, R, Anderson, HR, Frostad, J, Estep, K, Balakrishnan, K, Brunekreef, B, Dandona, L, Dandona, R, Feigin, V, Freedman, G, Hubbell, B, Jobling, A, Kan, H, Knibbs, L, Liu, Y, Martin, R, Morawska, L, Pope, CA, 3rd, Shin, H, Straif, K, Shaddick, G, Thomas, M, van Dingenen, R, van Donkelaar, A, Vos, T, Murray, CJL, Forouzanfar, MH: Estimates and 25-year trends of the global burden of disease attributable to ambient air pollution: an analysis of data from the Global Burden of Diseases Study 2015. *Lancet*, 389: 1907-1918, 2017.
21. Burnett, RT, Pope, CA, 3rd, Ezzati, M, Olives, C, Lim, SS, Mehta, S, Shin, HH, Singh, G, Hubbell, B, Brauer, M, Anderson, HR, Smith, KR, Balmes, JR, Bruce, NG, Kan, H, Laden, F, Pruss-Ustun, A, Turner, MC, Gapstur, SM, Diver, WR, Cohen, A: An integrated risk function for estimating the global burden of disease attributable to ambient fine particulate matter exposure. *Environ Health Perspect*, 122: 397-403, 2014.
22. Lim, SS, Vos, T, Flaxman, AD, Danaei, G, Shibuya, K, Adair-Rohani, H, Amann, M, Anderson, HR, Andrews, KG, Aryee, M, Atkinson, C, Bacchus, LJ, Bahalim, AN, Balakrishnan, K, Balmes, J, Barker-Collo, S, Baxter, A, Bell, ML, Blore, JD, Blyth, F, Bonner, C, Borges, G, Bourne, R, Boussinesq, M, Brauer, M, Brooks, P, Bruce, NG, Brunekreef, B, Bryan-Hancock, C, Bucello, C, Buchbinder, R, Bull, F, Burnett, RT, Byers, TE, Calabria, B, Carapetis, J, Carnahan, E, Chafe, Z, Charlson, F, Chen, H, Chen, JS, Cheng, AT, Child, JC, Cohen, A, Colson, KE, Cowie, BC, Darby, S, Darling, S, Davis, A, Degenhardt, L, Dentener, F, Des Jarlais, DC, Devries, K, Dherani, M, Ding, EL, Dorsey, ER, Driscoll, T, Edmond, K, Ali, SE, Engell, RE, Erwin, PJ, Fahimi, S, Falder, G, Farzadfar, F, Ferrari, A, Finucane, MM, Flaxman, S, Fowkes, FG, Freedman, G, Freeman, MK, Gakidou, E, Ghosh, S, Giovannucci, E, Gmel, G, Graham, K, Grainger, R, Grant, B, Gunnell, D, Gutierrez, HR, Hall, W, Hoek, HW, Hogan, A, Hosgood, HD, 3rd, Hoy, D, Hu, H, Hubbell, BJ, Hutchings, SJ, Ibeanusi, SE, Jacklyn, GL, Jasrasaria, R, Jonas, JB, Kan, H, Kanis, JA, Kassebaum, N, Kawakami, N, Khang, YH, Khatibzadeh, S, Khoo, JP, Kok, C, Laden, F, Lalloo, R, Lan, Q, Lathlean, T, Leasher, JL, Leigh, J, Li, Y, Lin, JK, Lipshultz, SE, London, S, Lozano, R, Lu, Y, Mak, J, Malekzadeh, R, Mallinger, L, Marcenes, W, March, L, Marks, R, Martin, R, McGale, P, McGrath, J, Mehta, S, Mensah, GA, Merriman, TR, Micha, R, Michaud, C, Mishra, V, Mohd Hanafiah, K, Mokdad, AA, Morawska, L, Mozaffarian, D, Murphy, T, Naghavi, M, Neal, B, Nelson, PK, Nolla, JM, Norman, R, Olives, C, Omer, SB, Orchard, J, Osborne, R, Ostro, B, Page, A, Pandey, KD, Parry, CD, Passmore, E, Patra, J, Pearce, N, Pelizzari, PM, Petzold, M, Phillips, MR, Pope, D, Pope, CA, 3rd, Powles, J, Rao, M, Razavi, H, Rehfuess, EA, Rehm, JT, Ritz, B, Rivara, FP, Roberts, T, Robinson, C, Rodriguez-Portales, JA, Romieu, I, Room, R, Rosenfeld, LC, Roy, A, Rushton, L, Salomon, JA, Sampson, U, Sanchez-Riera, L, Sanman, E, Sapkota, A, Seedat, S, Shi, P, Shield, K, Shivakoti, R, Singh, GM, Sleet, DA, Smith, E, Smith, KR, Stapelberg, NJ, Steenland, K, Stockl, H, Stovner, LJ, Straif, K, Straney, L, Thurston, GD, Tran, JH, Van Dingenen, R, van Donkelaar, A, Veerman, JL, Vijayakumar, L, Weintraub, R, Weissman, MM, White, RA, Whiteford, H, Wiersma, ST, Wilkinson, JD, Williams, HC, Williams, W, Wilson, N, Woolf, AD, Yip, P, Zielinski, JM, Lopez, AD, Murray, CJ, Ezzati, M, AlMazroa, MA, Memish, ZA: A comparative risk assessment of burden of disease and injury attributable to 67 risk factors and risk factor clusters in 21 regions, 1990-2010: a systematic analysis for the Global Burden of Disease Study 2010. *Lancet*, 380: 2224-2260, 2012.
23. Heinzl, H, Kaider, A: Gaining more flexibility in Cox proportional hazards regression models with cubic spline functions. *Computer methods and programs in biomedicine*, 54: 201-208, 1997.
24. Whitsel, EA, Rose, KM, Wood, JL, Henley, AC, Liao, D, Heiss, G: Accuracy and repeatability of commercial geocoding. *American journal of epidemiology*, 160: 1023-1029, 2004.
25. Miller, KA, Siscovick, DS, Sheppard, L, Shepherd, K, Sullivan, JH, Anderson, GL, Kaufman, JD: Long-term exposure to air pollution and incidence of cardiovascular events in women. *The New England journal of medicine*, 356: 447-458, 2007.
26. <http://www.countyhealthrankings.org/rankings/data>. Robert Wood Johnson Foundation, pp County Health Rankings & Roadmaps.
27. Remington, PL, Catlin, BB, Gennuso, KP: The County Health Rankings: rationale and methods. *Popul Health Metr*, 13: 11, 2015.

28. Davis, LA, Mann, A, Cannon, GW, Mikuls, TR, Reimold, AM, Caplan, L: Validation of Diagnostic and Procedural Codes for Identification of Acute Cardiovascular Events in US Veterans with Rheumatoid Arthritis. *EGEMS (Wash DC)*, 1: 1023, 2013.
29. Kleinbaum, DGK, M. : *Survival Analysis*, New York, Springer, 2005.
